# Supplementary material
Source: PubMed Central journal article supplement (PMC3544890)
Supplement: supp_00514.2012_suppfigure.pdf [file supp_00514.2012_suppfigure.pdf]

## AMANO et al. Supplementary data set

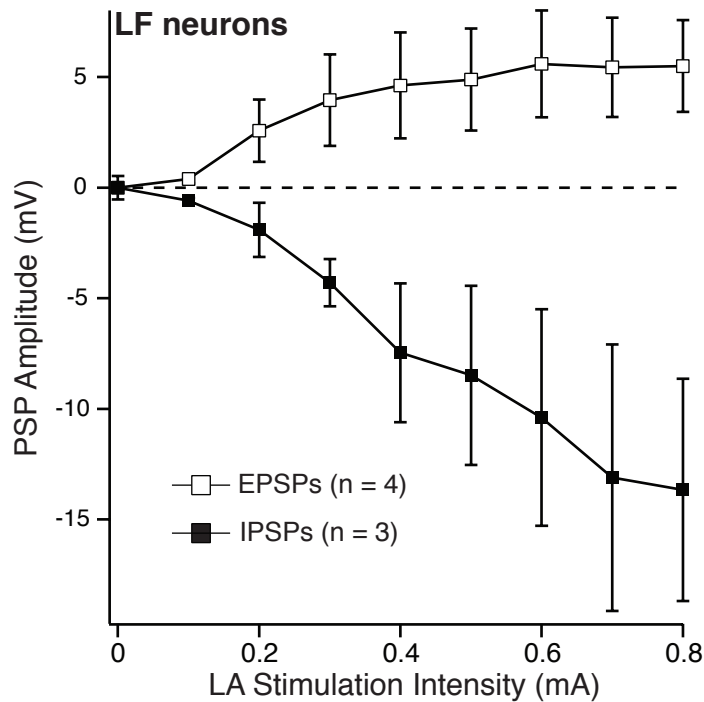

LA-evoked responses in late-firing CeL neurons. (A) Average EPSP (positive values) and IPSP (negative values) amplitudes  $\pm$  SEM (y-axis) as a function of LA stimulation intensity (x-axis). For EPSP measurements, the pre-stimulus  $V_m$  of the cells was set to -80 mV. For IPSP measurements, the pre-stimulus  $V_m$  of the cells was set to 0 mV. In all tested cells, LA shocks were 0.1 ms in duration. Although the number of LF cells we recorded is too low for meaningful statistical comparisons, the trend was for these cells to behave like RS cells: similar EPSP amplitudes and lower IPSP amplitudes than LTB neurons.
